# Supplementary material
Source: PubMed Central journal article supplement (PMC7151491)
Supplement: mmc1.pdf [file mmc1.pdf]

| Clinical Features                                                                      | All Patients (n = 17) |
|----------------------------------------------------------------------------------------|-----------------------|
| <b>Demographics</b>                                                                    |                       |
| Age of Patients (range, median)                                                        | 20 – 75 (37)          |
| Male Sex (Number, %)                                                                   | 11 (65%)              |
| <b>Symptoms at Presentation (Number, %)</b>                                            |                       |
| Fever                                                                                  | 14 (82%)              |
| Cough                                                                                  | 12 (71%)              |
| Shortness of Breath                                                                    | 3 (18%)               |
| <u>Rhinorrhea</u>                                                                      | 6 (35%)               |
| Sore Throat                                                                            | 6 (35%)               |
| Ocular Symptoms (Red eye, tearing, blurring of vision, discharge, colour desaturation) | 0 (0%) <sup>a</sup>   |

**a:** 1 patient developed eye redness and chemosis during hospital stay

**Table 1: Clinical Features of COVID-19 Patients Recruited For Study**
